# Supplementary material for: How does the phytoplankton–light feedback affect the marine N 2 O inventory?
Source: Copernicus journal article supplement (doi:10.5194/esd-14-399-2023), 2023-04-12
Supplement: Supplementary file 1 [file esd-14-399-2023-supplement.pdf]

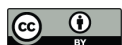

## *Supplement of*

# **How does the phytoplankton–light feedback affect the marine N<sub>2</sub>O inventory?**

**Sarah Berthet et al.**

*Correspondence to:* Sarah Berthet ([sarah.berthet@meteo.fr](mailto:sarah.berthet@meteo.fr))

The copyright of individual parts of the supplement might differ from the article licence.

This Supplement includes:

A. Supporting text

N<sub>2</sub>O parameterization in PISCESv2

B. Supporting figures

Figure S1: Schematic diagram of the numerical set

Figure S2: Annual mean temperature (°C)

Figure S3: Time-depth diagram of temperature (°C)

Figure S4: Annual density vertically integrated (kg/m<sup>2</sup>) as a function of the annual OHC300 (ZJ)

Figure S5: Annual mean of the CHL modelled by PISCESv2 between 0 and 300 meters (mgCHL m<sup>-3</sup>)

Figure S6: Annual mean oxygen concentration (mmol m<sup>-3</sup>)

**A. Supporting text**

**N<sub>2</sub>O parameterization in PISCESv2**

As described by Aumont et al. (2015), PISCESv2 models five limiting nutrients for phytoplankton growth: nitrate and ammonium, phosphate, silicate and iron. The phosphate, nitrate-ammonium nutrient pools are not really independent in PISCESv2, as they are linked by a constant Redfield ratio across all modelled organic compartments. Redfield ratios are set to 122:16:1 for C:N:P following Takahashi et al. (1985) and the -O:C ratio is set to 1.34 (Kortzinger et al., 2001).

For our study the marine N<sub>2</sub>O cycle described below was added to PISCESv2. In the ocean, N<sub>2</sub>O production and consumption are driven by marine bacteria in slightly oxygenated waters. N<sub>2</sub>O can occur as a by-product during microbial nitrification and as an intermediate product during denitrification (Freing et al., 2012). The oxic-anoxic interface above oxygen minimum zones provides appropriate conditions to enable N<sub>2</sub>O production (Ji et al., 2018). In the absence of oxygen, nitrate (NO<sub>3</sub><sup>-</sup>) is the next preferred electron acceptor for respiration after oxygen according to the electrochemical series (Lam and Kuypers, 2011). Denitrification has been shown to be the dominant process for N<sub>2</sub>O production in the

southern (Ji et al., 2015, 2018) and northern (Ji et al., 2018) part of the Pacific oxygen minimum zone. While nitrification is typically assumed to be an aerobic process, substantial suboxic nitrification has also been reported in many of the world ocean's major suboxic zones.

The bacterial pool is not yet explicitly modelled in PISCESv2. Processes of N<sub>2</sub>O production like nitrification or denitrification are not formally expressed, and PISCESv2 diagnoses their effects from specific environmental conditions. A modelling approach relying on the indirect representation of the N<sub>2</sub>O yield is rather common in present Earth system models due to the complexity of processes involved (Battaglia and Joos, 2018). For example, in MPI-ESM 1-2-LR (Ilyina et al., 2013) and MIROC-ES2L (Hajima et al., 2020), two of the few other Earth system models simulating marine N<sub>2</sub>O emissions in CMIP6 (S  f  rian et al., 2020), the production of N<sub>2</sub>O is mainly linked to the consumption of oxygen (O<sub>2</sub>) during remineralization of organic matter.

In PISCESv2 it is assumed that the distribution of nitrifying bacteria in the model is ubiquitous in the ocean interior, that is wherever there is export of organic matter to depth the model simulates nitrification, consuming ammonium and producing nitrate (Martinez-Rey et al., 2015). Nitrification is particularly enhanced in the absence of light, whereas oxygen levels should be above the suboxic threshold of 1 µmol L<sup>-1</sup>. Denitrification is computed in the model where dissolved oxygen concentration falls below 5 µmol L<sup>-1</sup>, which defines suboxic waters (Cocco et al., 2013; Bopp et al., 2013).

At each grid point below 100 m depth (as N<sub>2</sub>O production is inhibited by light), a unitless function  $f(O_2)$  depending on the oxygen concentration [O<sub>2</sub>] (in µmol L<sup>-1</sup>) is computed following:

$$\left. \begin{aligned} f([O_2] < 1 \mu\text{mol L}^{-1}) &= [O_2] \\ f(1 \mu\text{mol L}^{-1} \leq [O_2] \leq 5 \mu\text{mol L}^{-1}) &= 1 \\ f([O_2] > 5 \mu\text{mol L}^{-1}) &= 0.7 \cdot \exp(-0.1 \cdot ([O_2] - 5)) + 0.3 \cdot \exp(-0.01 \cdot ([O_2] - 5)) \end{aligned} \right\} (1)$$

$f(O_2)$  allows to evaluate the suboxic production of N<sub>2</sub>O based on Martinez-Rey et al. (2015):

$$[N_2O]_{\text{suboxic}} = \alpha + \beta \cdot f(O_2) \quad (2)$$

with  $\alpha$ , being the nitrification coefficient for N<sub>2</sub>O background production equal to 10<sup>-4</sup> mol N<sub>2</sub>O per mol O<sub>2</sub> consumed.  $\beta$ , is the denitrification coefficient which scales the oxygen-dependent function. It is equal to 30 · 10<sup>-4</sup> mol N<sub>2</sub>O per mol O<sub>2</sub> consumed.

The local trend of nitrous oxide concentration  $[N_2O]$  is finally evaluated by Eq. (3) at each time step as:

$$\begin{aligned} d[N_2O]/dt = & [N_2O]_{\text{suboxic}} * z_{\text{olimit}} * o_{2\text{ut}} & (3.1) \text{ remineralization} \\ & - \text{sink}_{N_2O} * [N_2O] & (3.2) \text{ sink term} \\ & + [N_2O]_{\text{suboxic}} * z_{\text{onitr}} * o_{2\text{nit}} & (3.3) \text{ nitrification} \\ & + [N_2O]_{\text{suboxic}} * z_{\text{grazing}} * o_{2\text{ut}} & (3.4) \text{ grazing} \end{aligned}$$

where in the first term (3.1)  $z_{\text{olimit}}$  accounts for ammonification in oxic waters through oxygen consumption during the remineralization of the organic matter at the  $o_{2\text{ut}}$  ratio of 133/122. In the second term (3.2)  $\text{sink}_{N_2O}$  is the  $N_2O$  sink term coefficient corresponding to the  $N_2O$  consumed under anoxic conditions by denitrification at a rate of  $7.12 \cdot 10^{-4} \text{ d}^{-1}$ . The third term (3.3) represents the part of  $N_2O$  concentration produced as an intermediate product of nitrification at a  $o_{2\text{nit}}$  ratio of 32/122. The last term (3.4) produces  $N_2O$  by grazing of the remnant organic matter.

The  $N_2O$  partial pressure difference across the air-sea interface (sea-to-air  $D_{\text{pn}2o}$ ; in atm) is then computed based on

$$D_{\text{pn}2o} = [N_2O]_{\text{surface}} / \text{solub}_{N_2O} - p_{n2o} \quad (4)$$

with  $p_{n2o}$ , the atmospheric partial pressure of  $N_2O$  in ppb, and  $\text{solub}_{N_2O}$  the  $N_2O$  solubility in  $\text{mol/m}^3$  which depends on in-situ temperature and practical salinity following the formulation of Weiss and Price (1980).

Finally sea-to-air  $N_2O$  fluxes ( $\text{mol/m}^2/\text{s}$ ) are inferred based on Wanninkhof (1992; 2014):

$$N_2O_{\text{flux}} = D_{\text{pn}2o} * \text{solub}_{N_2O} * K_{gN_2O} \quad (5)$$

with  $K_{gN_2O}$  being the piston velocity for  $N_2O$  (m/s), which depends on wind speed, ice fraction and temperature.

## References

**Aumont, O., Ethé, C., Tagliabue, A., Bopp, L., and Gehlen, M.:** PISCES-v2: An ocean biogeochemical model for carbon and ecosystem studies. Geoscientific Model Development, 8, 2465–2513, 2015.

**Battaglia**, G., and Joos, F.: Marine N<sub>2</sub>O emissions from nitrification and denitrification constrained by modern observations and projected in multimillennial global warming simulations. *Global Biogeochemical Cycles*, 32, 92–121. <https://doi.org/10.1002/2017GB005671>, 2018.

**Bopp**, L., Resplandy, L., Orr, J. C., Doney, S. C., Dunne, J. P., Gehlen, M., Halloran, P., Heinze, C., Ilyina, T., Séférian, R., Tjiputra, J., and Vichi, M.: Multiple stressors of ocean ecosystems in the 21st century: projections with CMIP5 models, *Biogeosciences*, 10, 6225–6245, <https://doi.org/10.5194/bg-10-6225-2013>, 2013.

**Cocco**, V., Joos, F., Steinacher, M., Frölicher, T. L., Bopp, L., Dunne, J., Gehlen, M., Heinze, C., Orr, J., Oschlies, A., Schneider, B., Segschneider, J., and Tjiputra, J.: Oxygen and indicators of stress for marine life in multi-model global warming projections, *Biogeosciences*, 10, 1849–1868, <https://doi.org/10.5194/bg-10-1849-2013>, 2013.

**Freing**, A., Wallace, D. W. R., and Bange, H. W.: Global oceanic production of nitrous oxide. *Philos. Trans. R. Soc. London Ser. B*, **367**, 1245–1255, 2012.

**Hajima**, T., Watanabe, M., Yamamoto, A., Tatebe, H., Noguchi, M. A., Abe, M., Ohgaito, R., Ito, A., Yamazaki, D., Okajima, H., Ito, A., Takata, K., Ogochi, K., Watanabe, S., and Kawamiya, M.: Development of the MIROC-ES2L Earth system model and the evaluation of biogeochemical processes and feedbacks, *Geosci. Model Dev.*, 13, 2197–2244, <https://doi.org/10.5194/gmd-13-2197-2020>, 2020.

**Ilyina**, T., Six, K. D., Segschneider, J., Maier-Reimer, E., Li, H., and Núñez-Riboni, I.: Global ocean biogeochemistry model HAMOCC: Model architecture and performance as component of the MPI-Earth system model in different CMIP5 experimental realizations, *J. Adv. Model. Earth Syst.*, 5, 287–315, doi:10.1029/2012MS000178, 2013.

**Ji**, Q., Babbin, A. R., Jayakumar, A., Oleynik, S., and Ward, B. B.: Nitrous oxide production by nitrification and denitrification in the Eastern Tropical South Pacific oxygen minimum zone, *Geophys. Res. Lett.*, 42, 10,755–10,764, doi:10.1002/2015GL066853, 2015.

**Ji**, Q., Buitenhuis, E., Suntharalingam, P., Sarmiento, J. L., and Ward, B. B. Global nitrous oxide production determined by oxygen sensitivity of nitrification and denitrification. *Global Biogeochemical Cycles*, 32, 1790–1802. <https://doi.org/10.1029/2018GB005887>, 2018.

**Kortzinger**, A., Hedges, J. I., and Quay, P. D.: Redfield ratios revisited: removing the biasing effect of anthropogenic CO<sub>2</sub>, *Limnol. Oceanogr.*, 46, 964–970, 2001.

**Lam**, P., and Kuypers, M.: Microbial Nitrogen Cycling Processes in Oxygen Minimum Zones, *Annual Review of Marine Science* 3:1, 317-345, doi:10.1146/annurev-marine-120709-142814, 2011.

**Martinez-Rey**, J., Bopp, L., Gehlen, M., Tagliabue, A., and Gruber, N.: Projections of oceanic N<sub>2</sub>O emissions in the 21st century using the IPSL Earth system model, *Biogeosciences*, 12, 4133–4148, <https://doi.org/10.5194/bg-12-4133-2015>, 2015.

**Séférián**, R., Berthet, S., Yool, A., Palmiéri, J., Bopp, L., Tagliabue, A., Kwiatkowski, L., Aumont, O., Christian, J., Dunne, J., Gehlen, M., Ilyina, T., John, J. G., Li, H., Long, M. C., Luo, J. Y., Nakano, H., Romanou, A., Schwinger, J., Stock, C., Santana-Falcon, Y., Takano, Y., Tjiputra, J., Tsujino, H., Watanabe, M., Wu, F., and Yamamoto, A.: Tracking Improvement in Simulated Marine Biogeochemistry Between CMIP5 and CMIP6. *Curr Clim Change Rep* 6, 95–119, <https://doi.org/10.1007/s40641-020-00160-0>, 2020.

**Takahashi**, T., Broecker, W. S., and Langer, S.: Redfield ratio based on chemical data from isopycnal surfaces, *J. Geophys. Res.*, 90, 6907–6924, 1985.

**Wanninkhof**, R.: Relationship between wind speed and gas exchange over the ocean, *J. Geophys. Res.*, 97, 7373–7382, doi:10.1029/92JC00188, 1992.

**Wanninkhof**, R.: Relationship between wind speed and gas exchange over the ocean revisited, *Limnol. Oceanogr. Methods*, 12, 351-362, doi:10.4319/lom.2014.12.351, 2014.

**Weiss**, R. F., and Price, B. A. : Nitrous oxide solubility in water and seawater *Marine Chemistry*, Volume 8, Issue 4, Pages 347-359; DOI: 10.1016/0304-4203(80)90024-9, 1980.

## B. Supporting figures

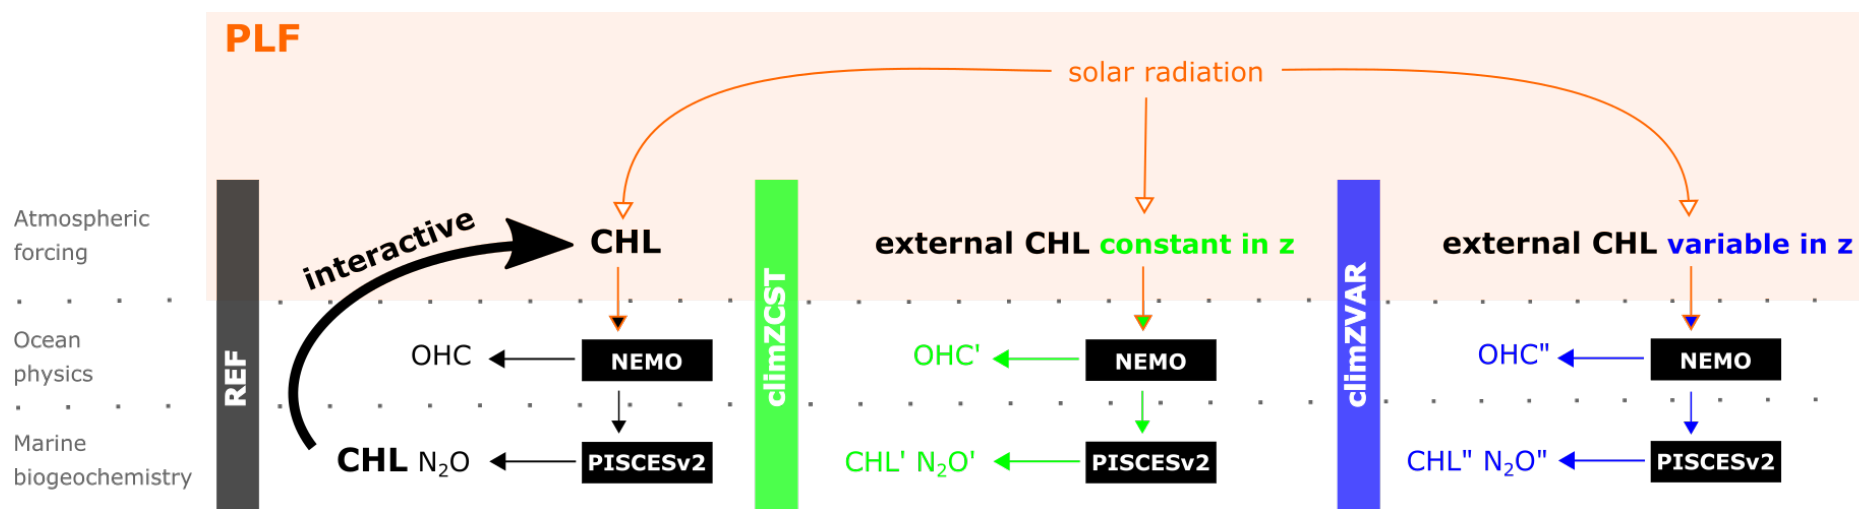

Figure S1: Schematic diagram of the numerical set. The phytoplankton-light feedback (PLF) encompasses the interaction between the incoming solar radiation (identical among the 3 simulations) and the CHL concentration used to filter its penetration through the water column. Different representations of the PLF are distinguished in function of the CHL used to filter the incoming radiation: it is either computed from PISCESv2 model (REF) or externally prescribed from an observed climatology (climZCST and climZVAR). We show that the nature of the CHL chosen to interact with light determines different states of ocean physics (e.g. OHC, temperature, dynamics, stratification) that drive different states of marine biogeochemistry (e.g. N<sub>2</sub>O, CHL, O<sub>2</sub>).

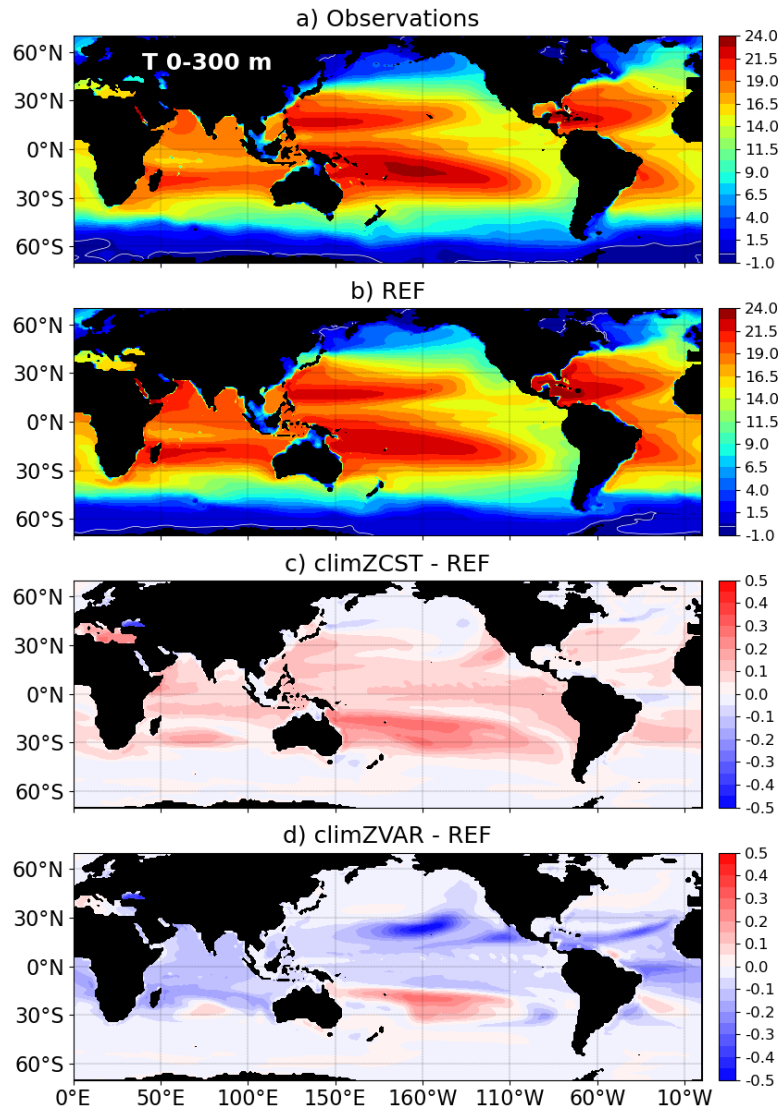

Figure S2: Annual mean temperature (°C) averaged over the 0-300 m ocean layer for the 2009-2018 period. The heat perturbations induced by changing the CHL field interacting with light are mainly restricted in the tropical band (*Figure S2, c-d*).

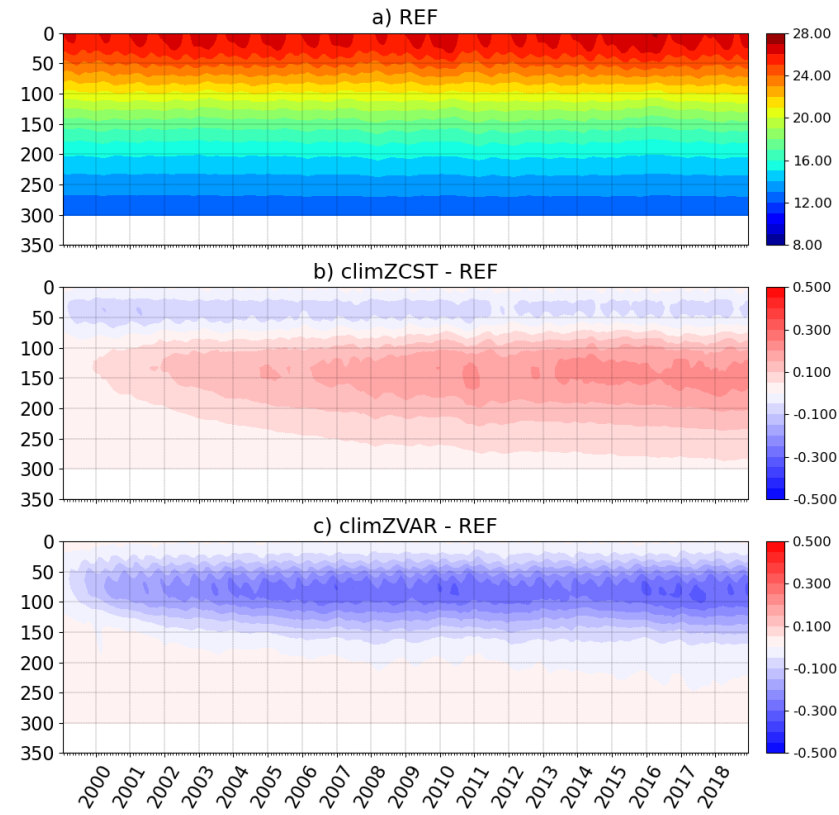

Figure S3: Time-depth diagram of temperature averaged over an extended tropical domain (35°S-35°N) for a) the control experiment REF, and its differences with b) climZCST and c) climZVAR.

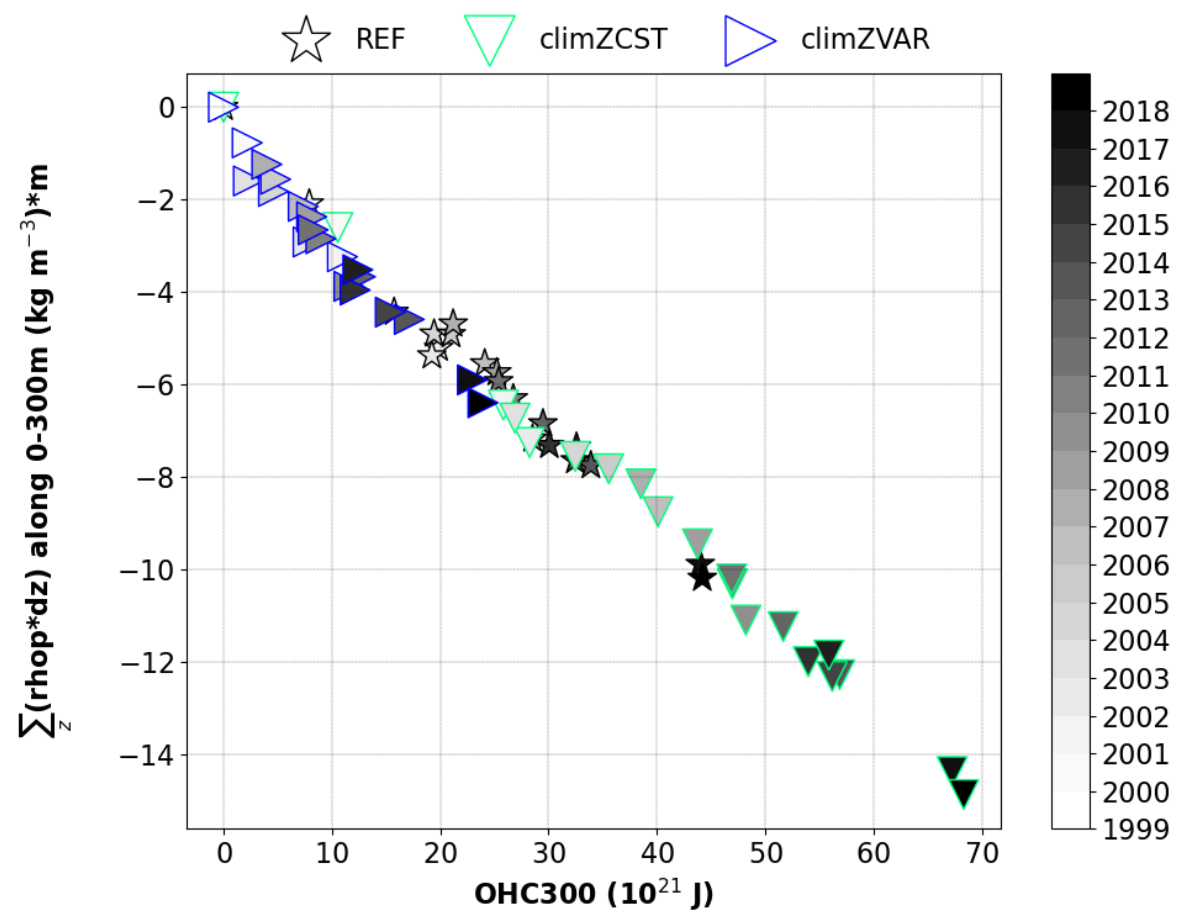

Figure S4: Annual density vertically integrated from 0 to 300 meter depths (kg/m<sup>2</sup>) as a function of the annual OHC300 (ZJ) and annually averaged over an extended tropical domain (35°S-35°N). All points reflect anomalies compared to year 1999.

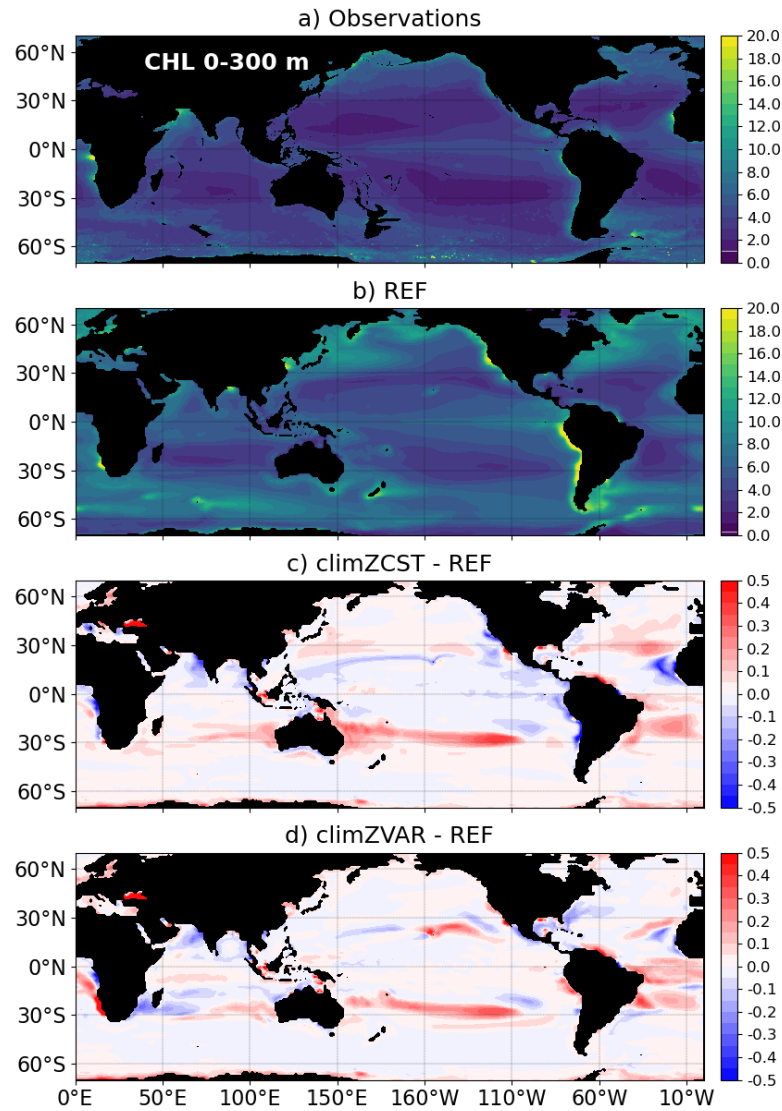

Figure S5: Annual mean of the vertical sum over the 0-300 m ocean layer of CHL concentration ( $\text{mgCHL m}^{-3}$ ) a) observed and b-d) modelled by PISCESv2 for the 2009-2018 period.

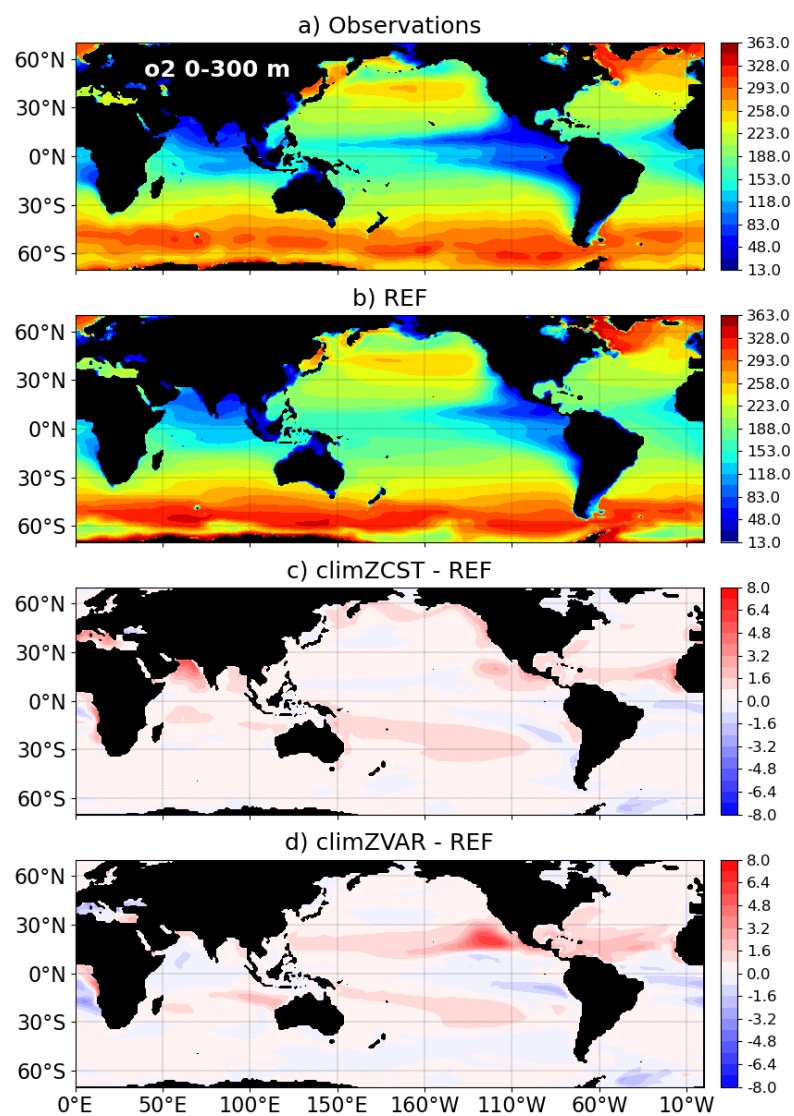

Figure S6: Annual mean oxygen concentration (mmol m<sup>-3</sup>) averaged over the 0-300 m ocean layer for the 2009-2018 period. An incomplete PLF contributes to overestimate the oxygen concentration in the North Pacific oxygen minimum zone, which in turn leads to a decrease in local N<sub>2</sub>O production (Figure 4, e-f).
